# Supplementary material for: Five-fold interpenetrated strongly hydrogen bonded rhomboid grid layers constructed from the aggregation of neutral coordination complexes with long pendant aromatic dicarboxylate and organodiimine ligands
Source: Royal Society of Chemistry journal article supplement (doi:10.1039/b705987f), 2007-09-19

Figure S1. TGA trace for complex **1**.

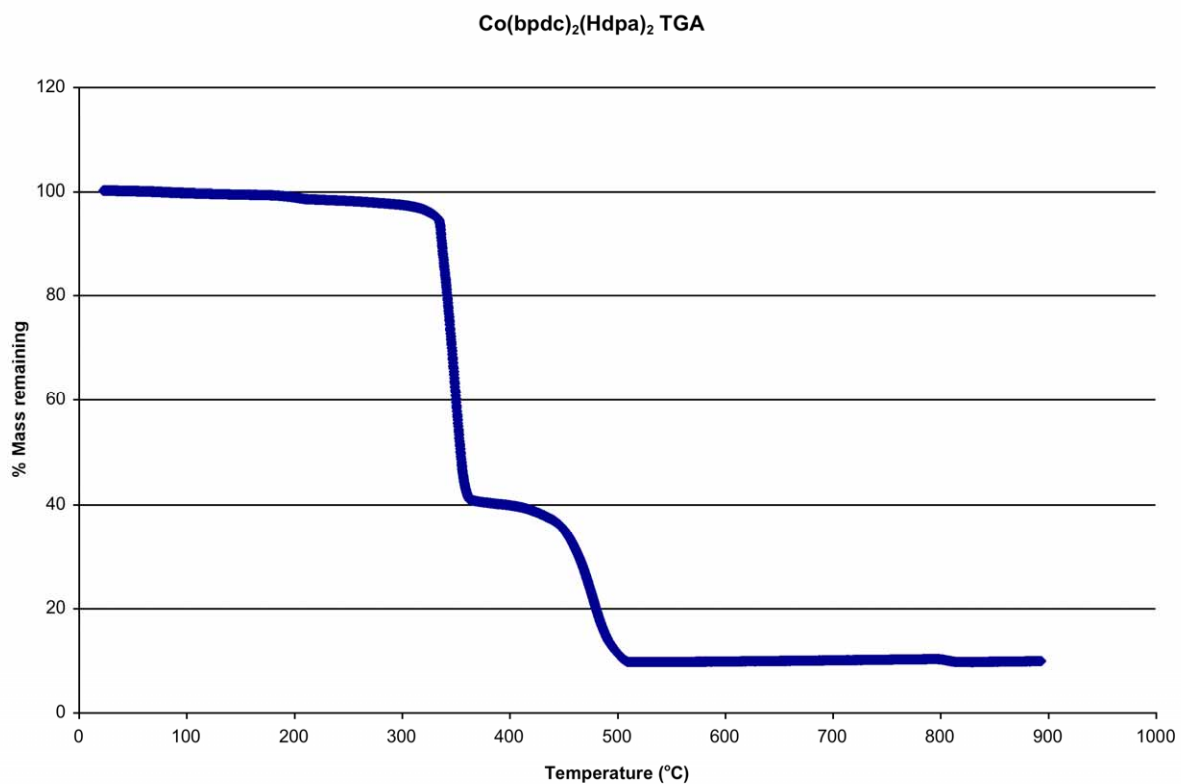

Figure S2. Powder XRD of a sample of **1** that had been thermolyzed in air at 180 °C. The thin black lines correspond to the calculated powder pattern of **1**.

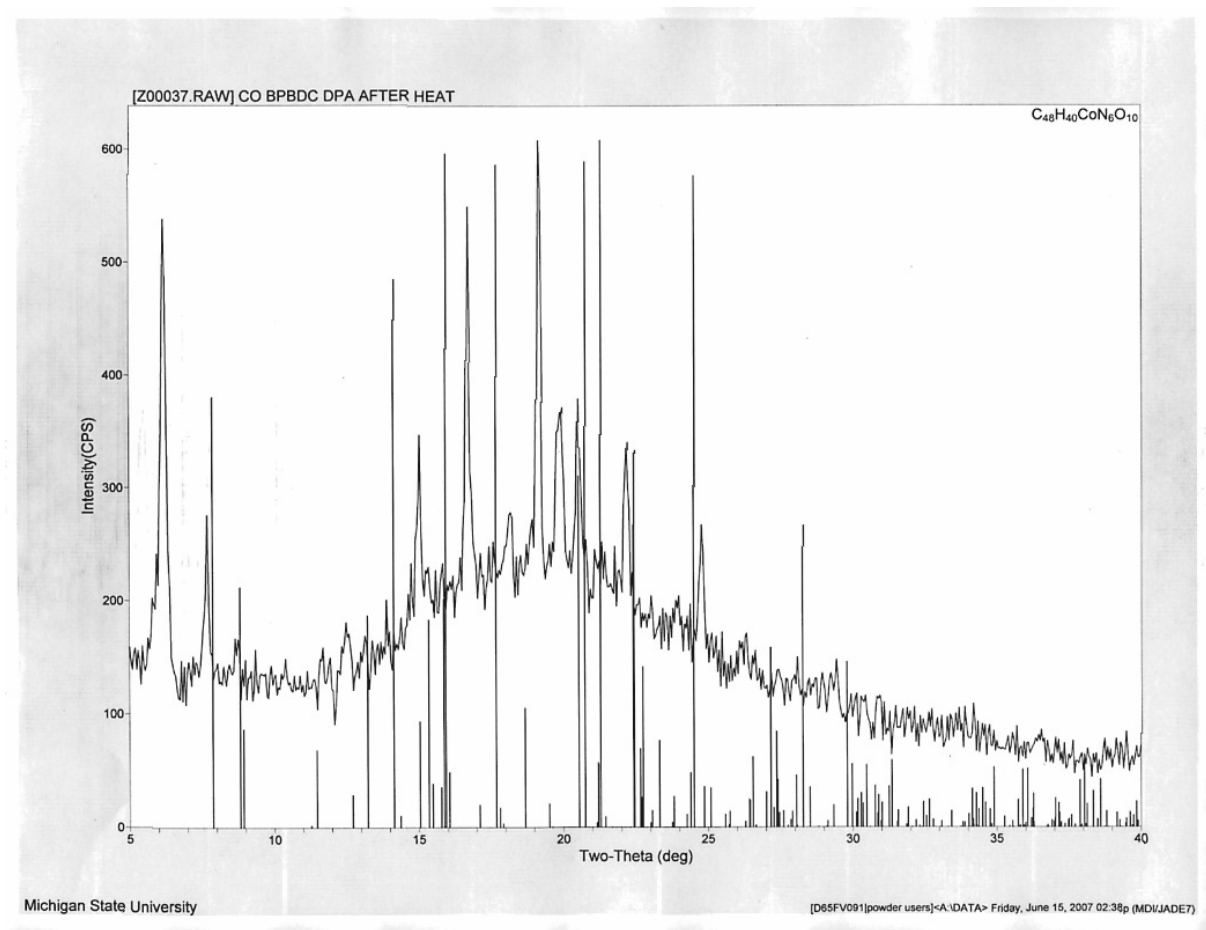

Figure S3. TGA trace for complex **2**.

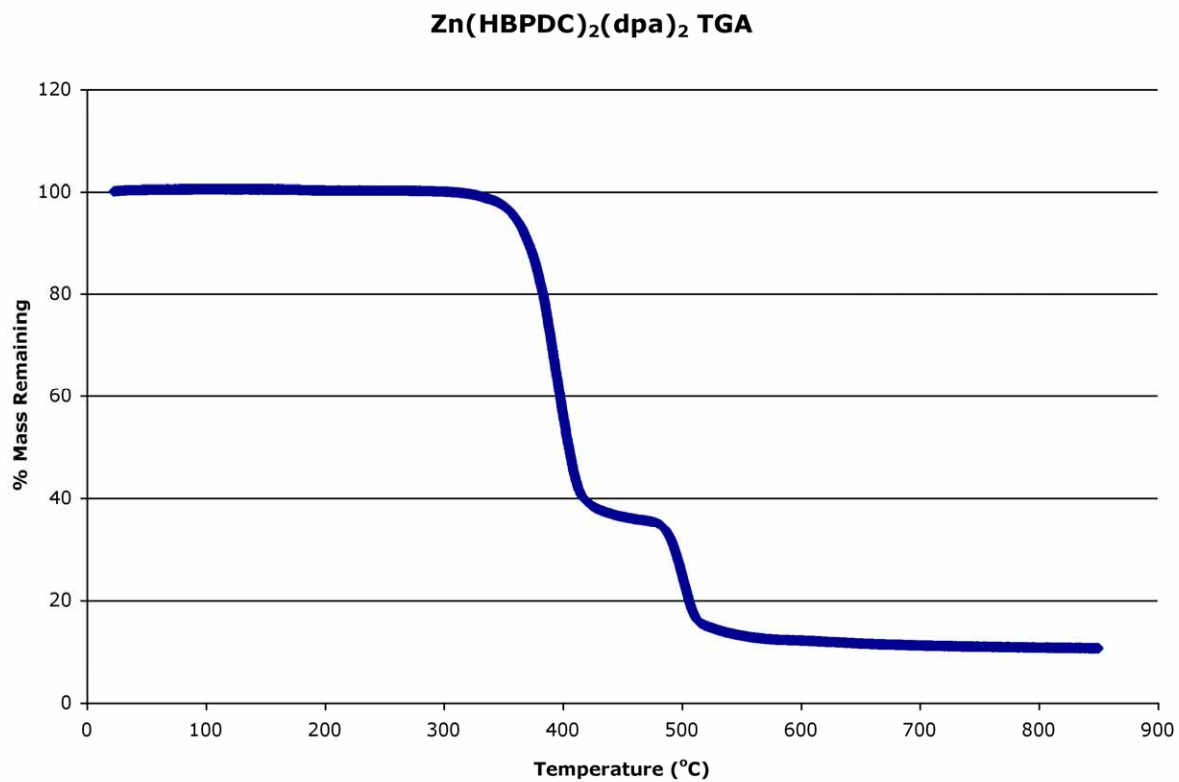

Figure 4. Powder XRD of a sample of **2** that had been thermolyzed in air at 180 °C. The thin black lines correspond to the calculated powder pattern of **2**.

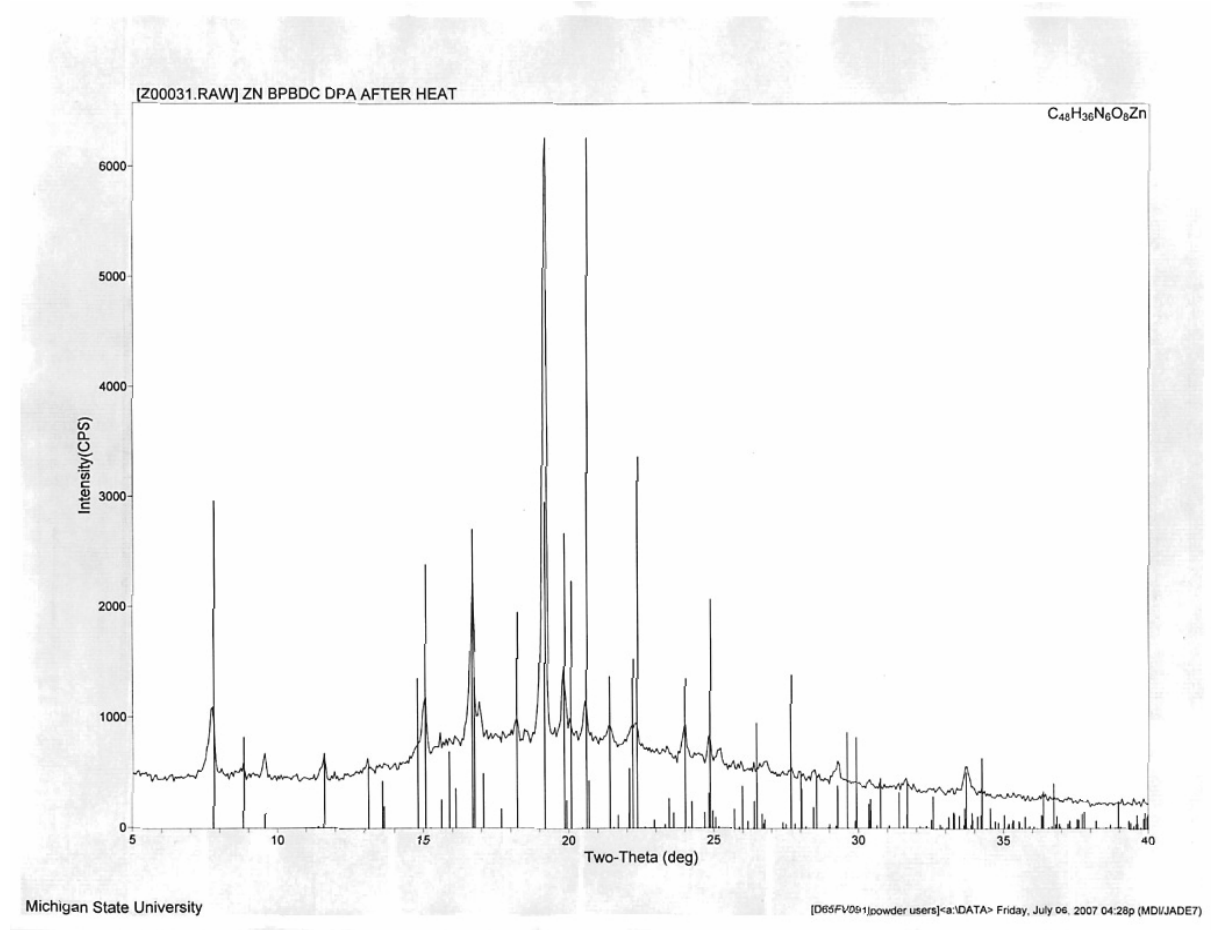

Supplement: b705987f.pdf [file b705987f.pdf]
